# Supplementary material for: Expression in Aneuploid Drosophila S2 Cells
Source: PLOS journal article supplement (doi:10.1371/journal.pbio.1000320), 2010-02-22
Supplement: S3 (10.1371/journal.pbio.1000320.s003) [file journal.pbio.1000320.s003]

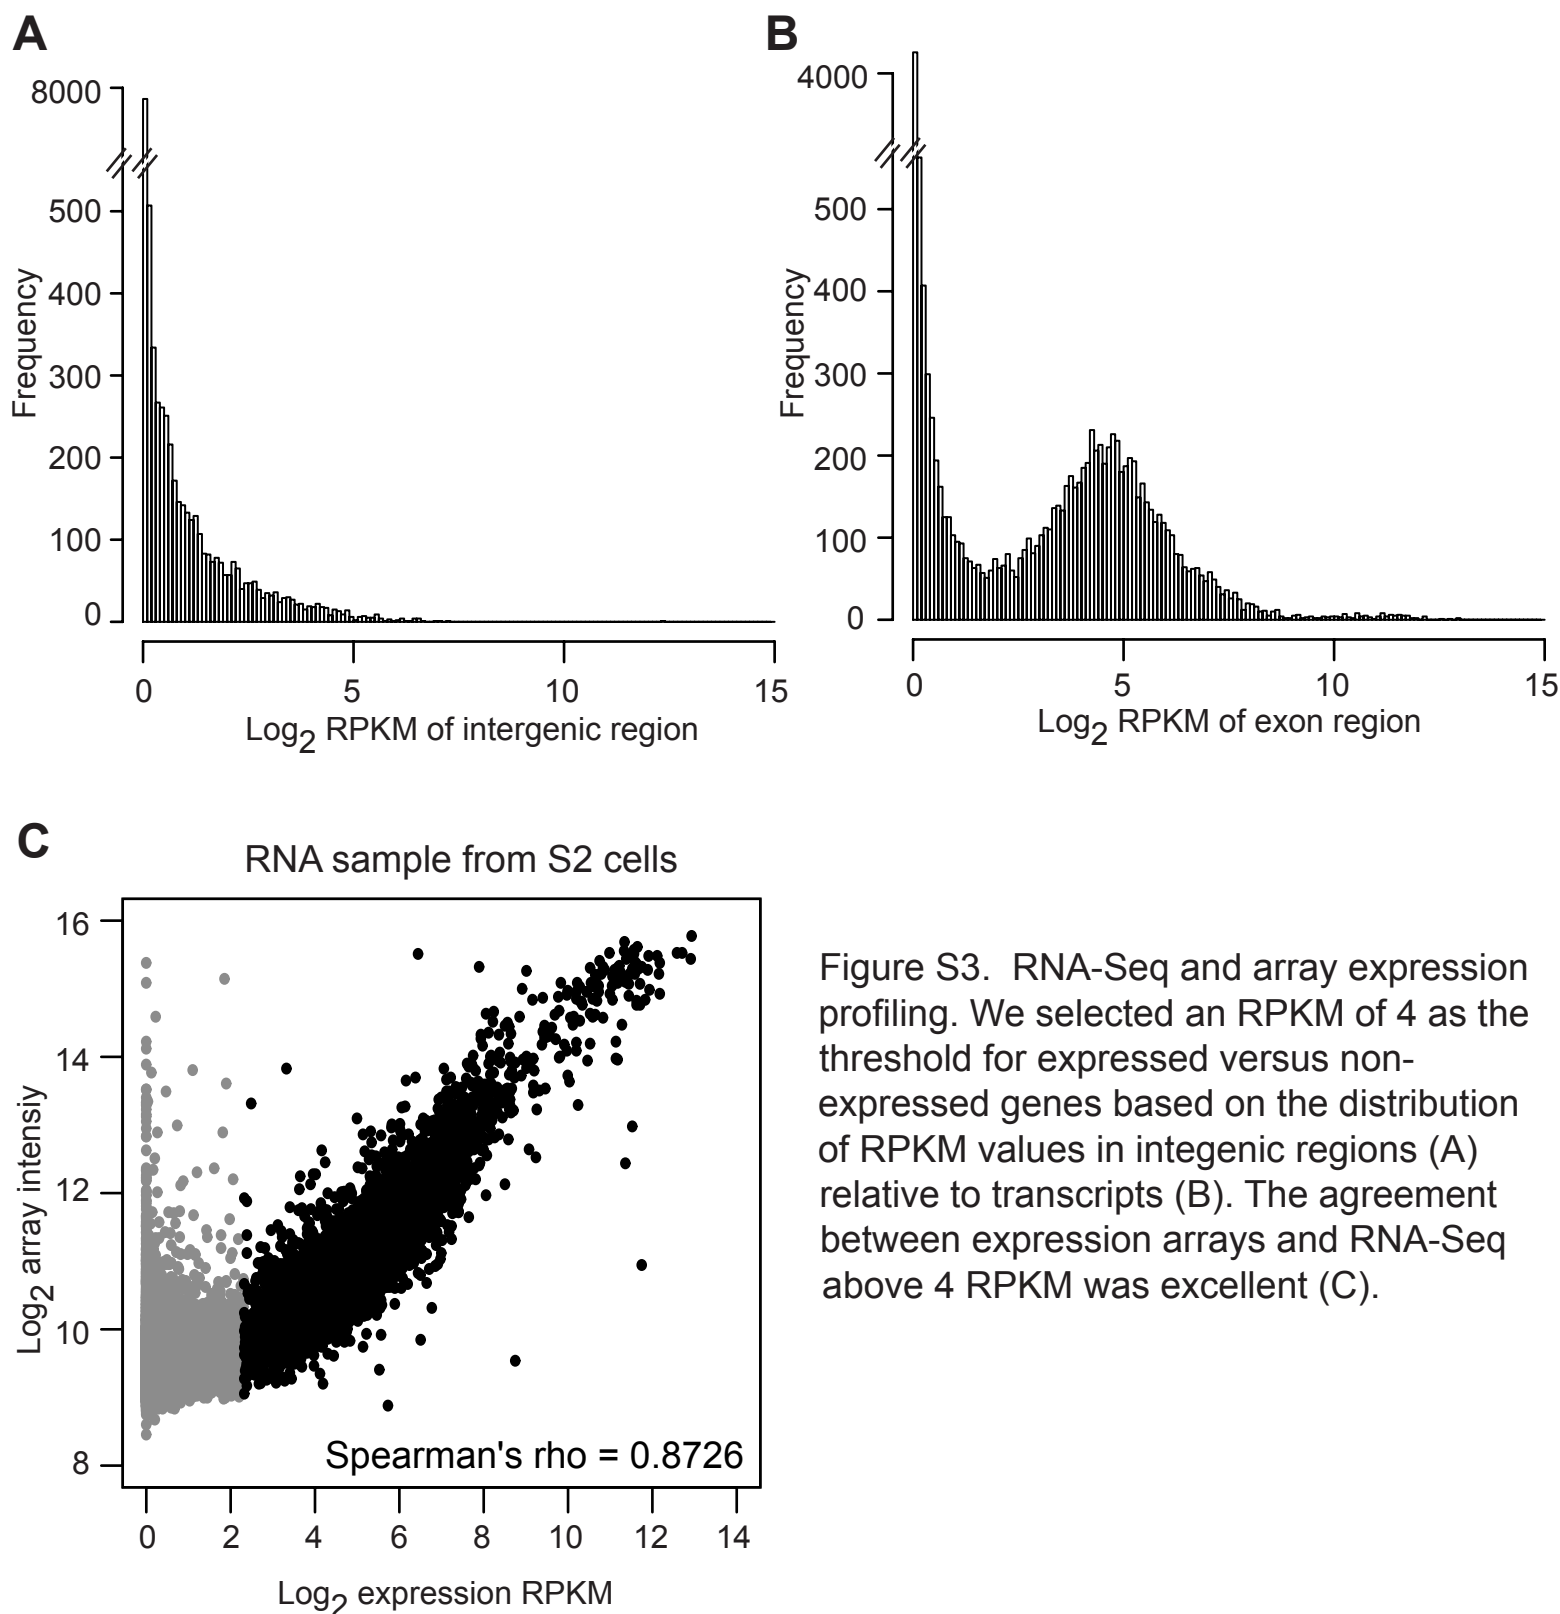

Figure S3. RNA-Seq and array expression profiling. We selected an RPKM of 4 as the threshold for expressed versus non-expressed genes based on the distribution of RPKM values in intergenic regions (A) relative to transcripts (B). The agreement between expression arrays and RNA-Seq above 4 RPKM was excellent (C).
